# Supplementary material for: Identified BIRC5 and HDAC1 as Novel Diagnostic Biomarkers Linked to Centrosome-Immune Crosstalk for Cutaneous Squamous Cell Carcinoma via Machine Learning-Based Multi-omics Analysis
Source: Research Square preprint supplement (doi:10.21203/rs.3.rs-7496212/v1), 2025-11-12
Supplement: Supplementary file 1 [file f82c76e51383599a5a3496a1.docx]

| **Primer** | **Sequences** | |
| --- | --- | --- |
| HDAC1 F | CTAGGATGTGCTCGGTGAGT | |
| HDAC1 R | GATCATGCCGTGGCTCAGAT |
| BIRC5 F | GTGAATGAGGCTTCTGGGCT |
| BIRC5 R | TGGCTTGCTGGTCTCTTCTG |
| internal reference-GAPDH F | CGAAGGTGGAGTCAACGGATTT |
| internal reference-GAPDH R | ATGGGTGGAATCATATTGGAAC |

**Table S1** Primer sequences
